# Supplementary material
Source: PubMed Central journal article supplement (PMC6927502)
Supplement: ehp-127-117001-s001.pdf [file ehp-127-117001-s001.pdf]

**Note to readers with disabilities:** *EHP* strives to ensure that all journal content is accessible to all readers. However, some figures and Supplemental Material published in *EHP* articles may not conform to [508 standards](#) due to the complexity of the information being presented. If you need assistance accessing journal content, please contact [ehp508@niehs.nih.gov](mailto:ehp508@niehs.nih.gov). Our staff will work with you to assess and meet your accessibility needs within 3 working days.

### **Supplemental Material**

#### **Early Biological Aging and Fetal Exposure to High and Low Ambient Temperature: A Birth Cohort Study**

Dries S. Martens, Michelle Plusquin, Bianca Cox, and Tim S. Nawrot

#### **Table of Contents**

##### **Table S1. Sensitivity analyses for placental TL.**

**Figure S1. Shape of the association between cord blood TL and ambient temperature in different weeks of pregnancy.** Estimates provided as a percent difference in TL (with 95% CI) relative to the reference (median) temperature of 11.1°C. Models were adjusted for date of delivery, gestational age, maternal pre-pregnancy BMI, maternal age, paternal age, newborn sex, newborn ethnicity, season of birth, parity, maternal smoking status, maternal education, pregnancy complications, maternal PM<sub>2.5</sub> exposure and batch.

**Figure S2. Shape of the association between placenta TL and ambient temperature in different weeks of pregnancy.** Estimates provided as a percent difference in TL (with 95% CI) relative to the reference (median) temperature of 11.1°C. Models were adjusted for date of delivery, gestational age, maternal pre-pregnancy BMI, maternal age, paternal age, newborn sex, newborn ethnicity, season of birth, parity, maternal smoking status, maternal education, pregnancy complications, maternal PM<sub>2.5</sub> exposure, and batch.

**Figure S3. Cold and heat effect estimates on placental TL.** Week specific estimates provided as a % difference in average relative TL (with 95% CI) for a 1°C increase in ambient temperature above the heat threshold (21.5°C) for associations with heat (A), and a 1°C decrease in ambient temperature below the cold threshold (2.5°C) for associations with cold (B). The combination of temperatures minimizing the residual deviance in the double-threshold DLNM for placental TL was 21.5°C (heat threshold) and 2.5°C (cold threshold). Models were adjusted for date of delivery, gestational age, maternal pre-pregnancy BMI, maternal age, paternal age, newborn sex, newborn ethnicity, season of birth, parity, maternal smoking status, maternal education, pregnancy complications, maternal PM<sub>2.5</sub> exposure and batch.

**Supplemental Table S1. Sensitivity analyses for placental TL**

| Model                                                    | n     | % difference (95% CI) in placenta TL |                   |
|----------------------------------------------------------|-------|--------------------------------------|-------------------|
|                                                          |       | Heat effect                          | Cold effect       |
| Main model                                               | 1,103 | -0.84 (-2.77, 1.13)                  | 0.76 (0.47, 1.06) |
| Unconstrained lag structure                              | 1,103 | -0.97 (-3.05, 1.16)                  | 0.74 (0.44, 1.05) |
| Adjustment for month delivery                            | 1,103 | -1.14 (-3.11, 0.87)                  | 0.79 (0.49, 1.10) |
| Adjustment humidity                                      | 1,103 | -1.43 (-3.40, 0.58)                  | 0.50 (0.19, 0.82) |
| No PM <sub>2.5</sub> adjustment                          | 1,103 | 0.00 (-1.91, 1.96)                   | 0.41 (0.14, 0.67) |
| Adjustment fruit and vegetables consumption <sup>a</sup> | 1,076 | -0.94 (-2.92, 1.07)                  | 0.77 (0.47, 1.07) |
| Adjustment physical activity <sup>b</sup>                | 1,048 | -1.09 (-3.07, 0.94)                  | 0.75 (0.45, 1.06) |
| Adjustment cord plasma vitamin D <sup>c</sup>            | 937   | -0.40 (-2.56, 1.80)                  | 0.67 (0.35, 0.99) |
| Adjustment maternal plasma vitamin D <sup>d</sup>        | 764   | -1.20 (-3.79, 1.45)                  | 0.49 (0.12, 0.86) |
| Excluding non-European                                   | 958   | -0.63 (-2.74, 1.53)                  | 0.74 (0.42, 1.05) |
| Excluding low educated                                   | 979   | -1.17 (-3.24, 0.96)                  | 0.72 (0.40, 1.04) |
| Excluding current and former smokers                     | 709   | -0.76 (-3.22, 1.77)                  | 0.93 (0.55, 1.31) |
| Excluding pregnancy complications                        | 964   | -1.13 (-3.23, 1.03)                  | 0.76 (0.44, 1.08) |
| Excluding cesarean sections                              | 1,060 | -1.01 (-2.97, 0.98)                  | 0.70 (0.40, 1.00) |
| Excluding all of the above                               | 471   | -1.28 (-4.38, 1.91)                  | 0.63 (0.18, 1.09) |
| Newborn boys                                             | 574   | -1.71 (-4.47, 1.13)                  | 0.85 (0.43, 1.27) |
| Newborn girls                                            | 529   | 0.34 (-2.51, 3.28)                   | 0.63 (0.20, 1.07) |

Estimates are averaged week specific estimates over the entire pregnancy. Estimates provided as a % difference (95%CI) in TL for a 1°C increase in ambient temperature above the heat threshold (21.5°C) for associations with heat and a 1°C decrease in ambient temperature below the cold threshold (2.5°C) for associations with cold. Models were adjusted for date of delivery, gestational age, maternal pre-pregnancy BMI, maternal age, paternal age, newborn sex, newborn ethnicity, season of birth, parity, maternal smoking status, maternal education, pregnancy complications, maternal PM<sub>2.5</sub> exposure and batch. The season of birth was removed from the model adjusting for month of delivery.

<sup>a</sup>Missing data on n= 27

<sup>b</sup>Missing data on n= 55

<sup>c</sup>Missing data on n= 166

<sup>d</sup>Missing data on n= 339

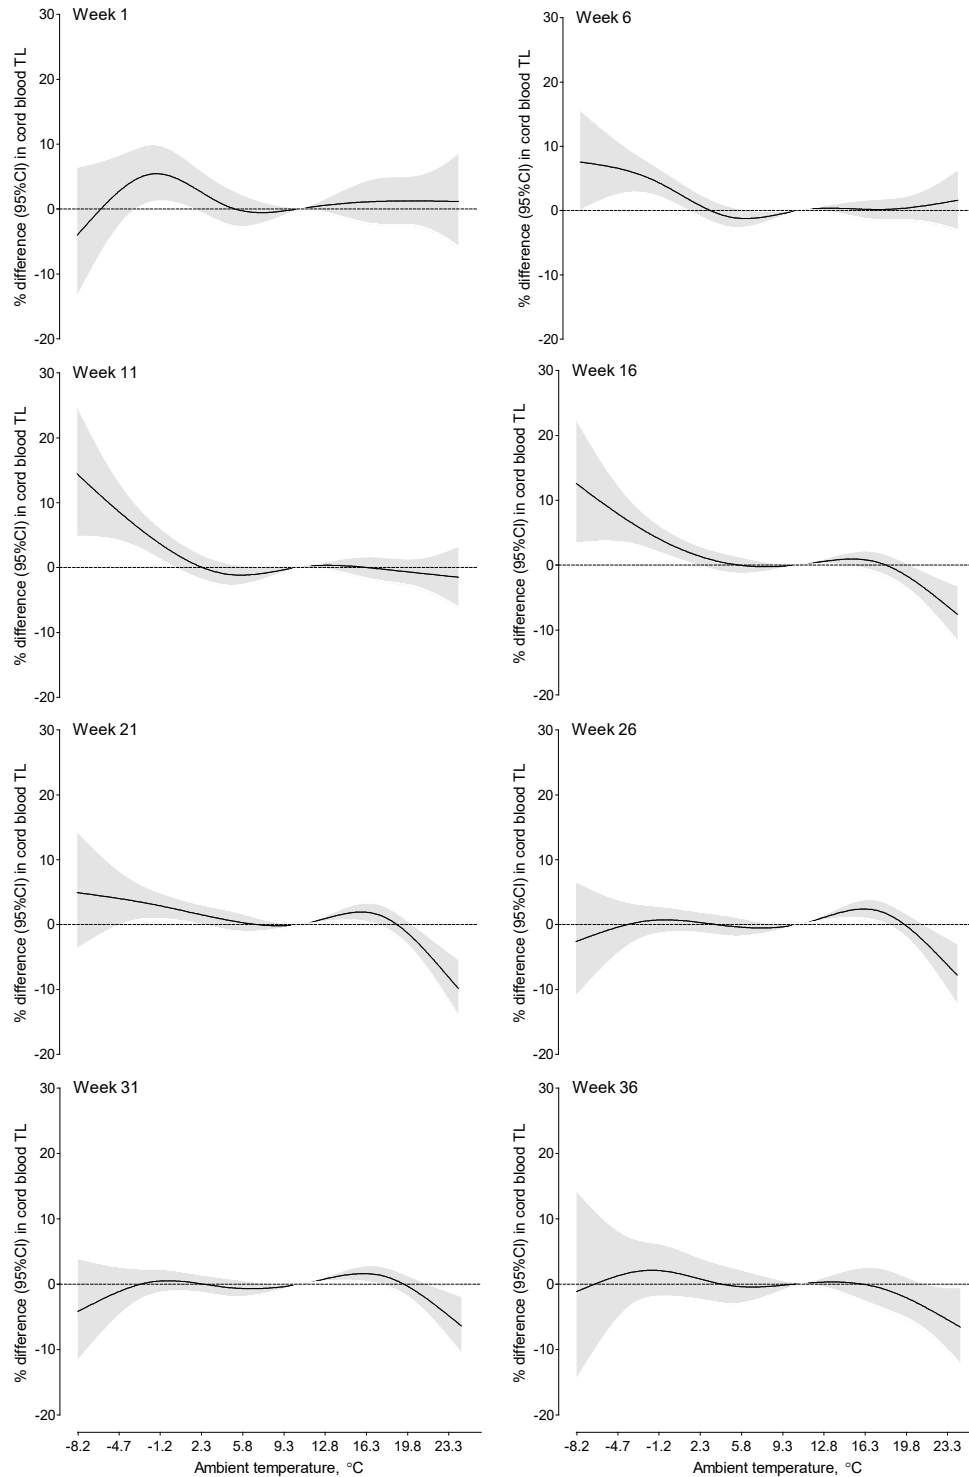

**Supplemental Figure S1. Shape of the association between cord blood TL and ambient temperature in different weeks of pregnancy.** Estimates provided as a percent difference in TL (with 95% CI) relative to the reference (median) temperature of 11.1°C. Models were adjusted for date of delivery, gestational age, maternal pre-pregnancy BMI, maternal age, paternal age, newborn sex, newborn ethnicity, season of birth, parity, maternal smoking status, maternal education, pregnancy complications, maternal PM<sub>2.5</sub> exposure and batch.

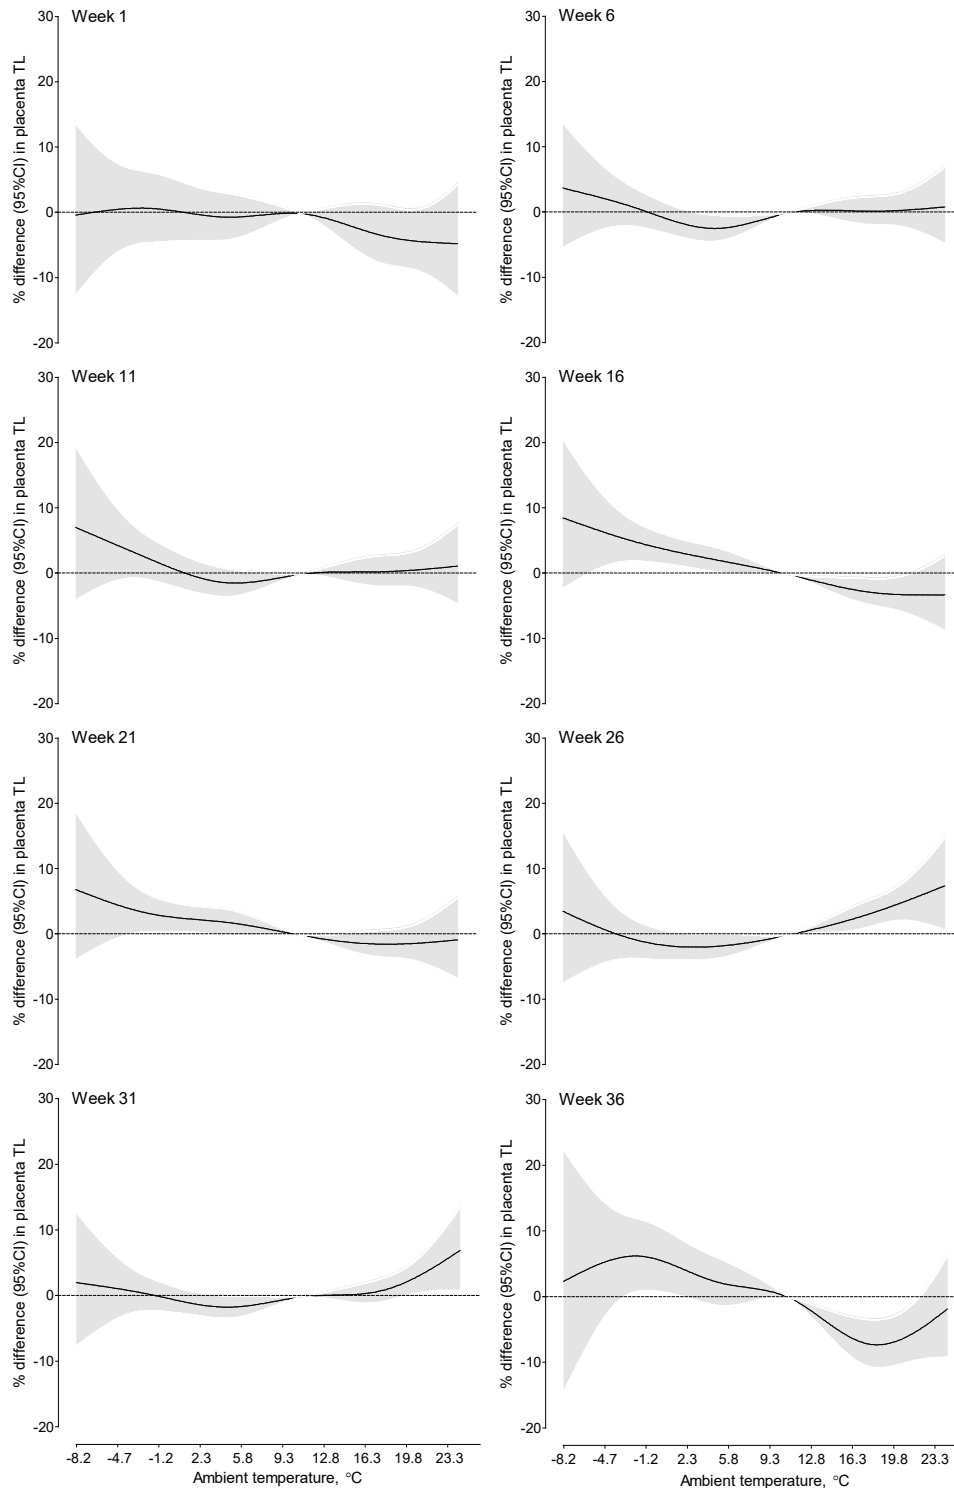

**Supplemental Figure S2. Shape of the association between placenta TL and ambient temperature in different weeks of pregnancy.** Estimates provided as a percent difference in TL (with 95% CI) relative to the reference (median) temperature of 11.1°C. Models were adjusted for date of delivery, gestational age, maternal pre-pregnancy BMI, maternal age, paternal age, newborn sex, newborn ethnicity, season of birth, parity, maternal smoking status, maternal education, pregnancy complications, maternal PM<sub>2.5</sub> exposure, and batch.

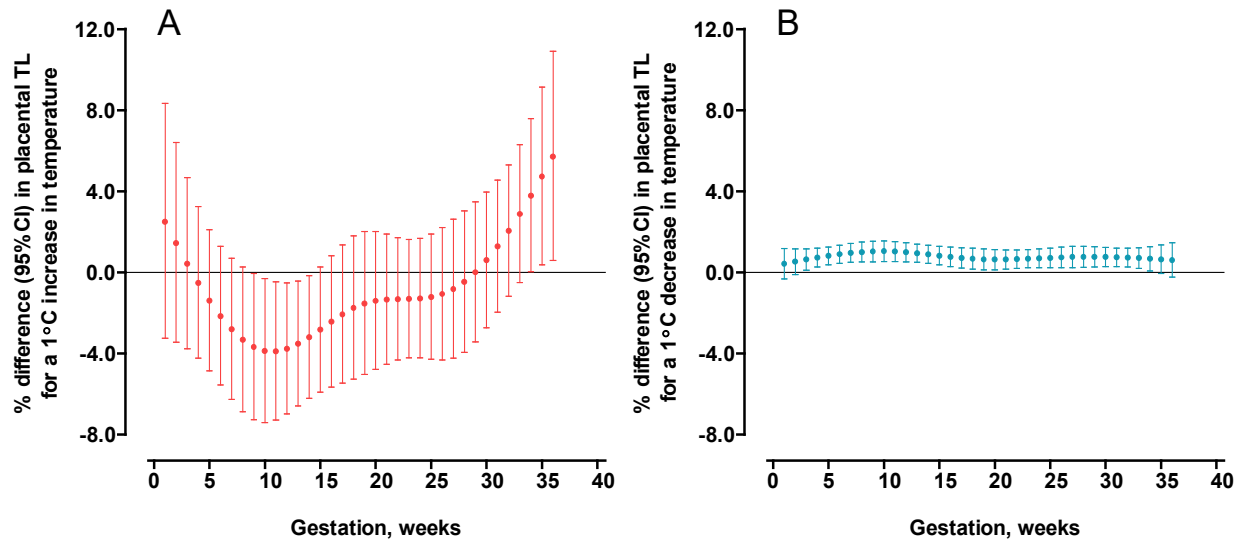

**Supplemental Figure S3. Cold and heat effect estimates on placental TL.**

Week specific estimates provided as a % difference in average relative TL (with 95% CI) for a 1°C increase in ambient temperature above the heat threshold (21.5°C) for associations with heat (A), and a 1°C decrease in ambient temperature below the cold threshold (2.5°C) for associations with cold (B). The combination of temperatures minimizing the residual deviance in the double-threshold DLNM for placental TL was 21.5°C (heat threshold) and 2.5°C (cold threshold). Models were adjusted for date of delivery, gestational age, maternal pre-pregnancy BMI, maternal age, paternal age, newborn sex, newborn ethnicity, season of birth, parity, maternal smoking status, maternal education, pregnancy complications, maternal PM<sub>2.5</sub> exposure and batch.
