# Supplementary material
Source: PubMed Central journal article supplement (PMC6927502)
Supplement: ehp-127-117001-s002.pdf [file ehp-127-117001-s002.pdf]

**Note to readers with disabilities:** *EHP* strives to ensure that all journal content is accessible to all readers. However, some figures and Supplemental Material published in *EHP* articles may not conform to [508 standards](#) due to the complexity of the information being presented. If you need assistance accessing journal content, please contact [ehp508@niehs.nih.gov](mailto:ehp508@niehs.nih.gov). Our staff will work with you to assess and meet your accessibility needs within 3 working days.

### **Supplemental Material**

#### **Early Biological Aging and Fetal Exposure to High and Low Ambient Temperature: A Birth Cohort Study**

Dries S. Martens, Michelle Plusquin, Bianca Cox, and Tim S. Nawrot

#### **Table of Contents**

##### **Table S1. Sensitivity analyses for placental TL.**

**Figure S1. Shape of the association between cord blood TL and ambient temperature in different weeks of pregnancy.** Estimates provided as a percent difference in TL (with 95% CI) relative to the reference (median) temperature of 11.1°C. Models were adjusted for date of delivery, gestational age, maternal pre-pregnancy BMI, maternal age, paternal age, newborn sex, newborn ethnicity, season of birth, parity, maternal smoking status, maternal education, pregnancy complications, maternal PM<sub>2.5</sub> exposure and batch.

**Figure S2. Shape of the association between placenta TL and ambient temperature in different weeks of pregnancy.** Estimates provided as a percent difference in TL (with 95% CI) relative to the reference (median) temperature of 11.1°C. Models were adjusted for date of delivery, gestational age, maternal pre-pregnancy BMI, maternal age, paternal age, newborn sex, newborn ethnicity, season of birth, parity, maternal smoking status, maternal education, pregnancy complications, maternal PM<sub>2.5</sub> exposure, and batch.

**Figure S3. Cold and heat effect estimates on placental TL.** Week specific estimates provided as a % difference in average relative TL (with 95% CI) for a 1°C increase in ambient temperature above the heat threshold (21.5°C) for associations with heat (A), and a 1°C decrease in ambient temperature below the cold threshold (2.5°C) for associations with cold (B). The combination of temperatures minimizing the residual deviance in the double-threshold DLNM for placental TL was 21.5°C (heat threshold) and 2.5°C (cold threshold). Models were adjusted for date of delivery, gestational age, maternal pre-pregnancy BMI, maternal age, paternal age, newborn sex, newborn ethnicity, season of birth, parity, maternal smoking status, maternal education, pregnancy complications, maternal PM<sub>2.5</sub> exposure and batch.
